# Supplementary material
Source: publisher figshare collection journal article supplement (https://diabetesjournals.figshare.com/ndownloader/files/26189177)
Supplement: Supplementary file 1 [file 26189177]

## Supplementary Materials

### Appendix S1

| <b>Terms</b>                  | <b>Diabetes Device Category</b>  |
|-------------------------------|----------------------------------|
| Continuous Glucose Monitoring | Continuous glucose monitoring    |
| CGM                           | Continuous glucose monitoring    |
| Glucose sensor                | Continuous glucose monitoring    |
| Sensor                        | Continuous glucose monitoring    |
| Flash glucose monitor         | Continuous glucose monitoring    |
| FGM                           | Continuous glucose monitoring    |
| Dexcom                        | Continuous glucose monitoring    |
| Guardian sensor               | Continuous glucose monitoring    |
| Flash Glucose monitoring      | Continuous glucose monitoring    |
| Freestyle Libre               | Continuous glucose monitoring    |
| BG                            | Self-monitoring of blood glucose |
| FS Glucose                    | Self-monitoring of blood glucose |
| Blood Glucose                 | Self-monitoring of blood glucose |
| Finger stick                  | Self-monitoring of blood glucose |
| Fingerstick                   | Self-monitoring of blood glucose |
| Self monitor blood glucose    | Self-monitoring of blood glucose |
| SMBG                          | Self-monitoring of blood glucose |
| Self monitoring blood glucose | Self-monitoring of blood glucose |
| Glucometer                    | Self-monitoring of blood glucose |
| meter                         | Self-monitoring of blood glucose |
| ACCU-CHEK                     | Self-monitoring of blood glucose |
| OneTouch                      | Self-monitoring of blood glucose |
| CONTOUR NEXT                  | Self-monitoring of blood glucose |
| Freestyle                     | Self-monitoring of blood glucose |
| Freestyle lite                | Self-monitoring of blood glucose |
| Freestyle lancets             | Self-monitoring of blood glucose |
| Insulin injection             | Insulin injection                |
| Insulin pen injection         | Insulin injection                |
| Multiple daily injections     | Insulin injection                |
| MDI                           | Insulin injection                |
| pen injection                 | Insulin injection                |
| shots of insulin              | Insulin injection                |
| insulin shots                 | Insulin injection                |
| Medtronic pump                | Insulin pump                     |

|                  |              |
|------------------|--------------|
| Minimed pump     | Insulin pump |
| Insulin pump     | Insulin pump |
| insulin infusion | Insulin pump |
| CSII             | Insulin pump |
| OmniPod          | Insulin pump |
| Cozmo            | Insulin pump |
| Deltec Cozmo     | Insulin pump |
| T slim           | Insulin pump |
| T:slim           | Insulin pump |

Table S1. Univariate comparison of device (either CGM or CSII) user vs. non-user within 6 month of disease diagnosis

| Variable                | User        | Non-users  | P value |
|-------------------------|-------------|------------|---------|
| N                       | 451         | 649        |         |
| Age, median (IQR)       | 16.7 (23.6) | 13.5 (8.5) | <0.001  |
| Gender, n (%)           |             |            | 0.886   |
| Male                    | 232 (51.4)  | 331 (51.0) |         |
| Female                  | 219 (48.6)  | 318 (49.0) |         |
| Race, n (%)             |             |            | 0.005   |
| White                   | 268 (59.4)  | 330 (50.8) |         |
| Non-White               | 183 (40.6)  | 319 (49.2) |         |
| Ethnicity, n (%)        |             |            | <0.001  |
| Hispanic                | 63 (14.0)   | 162 (25.0) |         |
| Non-Hispanic            | 326 (72.3)  | 372 (57.3) |         |
| Insurance, n (%)        |             |            | <.001   |
| Private                 | 360 (79.8)  | 442 (68.1) |         |
| Public                  | 91 (20.2)   | 207 (31.9) |         |
| Baseline HbA1c, mean±sd | 8.1±1.4     | 8.1±1.6    | 0.412   |

Table S2. Results of mixed effects regression model analyses for HbA1c between CGM users and non-users

| Variable                  | $\beta$ | Std. Error | P value |
|---------------------------|---------|------------|---------|
| Intercept                 | 2.989   | 0.188      | <0.001  |
| Group                     |         |            |         |
| CGM users                 | -0.162  | 0.078      | 0.039   |
| CGM non-users (reference) |         |            |         |
| Time                      |         |            |         |
| Time1 (reference)         |         |            |         |
| Time2                     | 0.142   | 0.031      | <0.001  |
| Time3                     | 0.208   | 0.033      | <0.001  |
| Time4                     | 0.252   | 0.035      | <0.001  |
| Age                       | -0.006  | 0.002      | 0.004   |
| Baseline HbA1c            | 0.578   | 0.022      | <0.001  |
| Ethnicity                 |         |            |         |
| Hispanic                  | 0.354   | 0.094      | <0.001  |
| Non-Hispanic (reference)  |         |            |         |
| Insurance                 |         |            |         |
| Private (reference)       |         |            |         |
| Public                    | 0.506   | 0.078      | <0.001  |

Table S3. Results of mixed effects regression model analyses for HbA1c between CSII users and non-users

| Variable                   | $\beta$ | Std. Error | P value |
|----------------------------|---------|------------|---------|
| Intercept                  | 3.369   | 0.208      | <0.001  |
| Group                      |         |            |         |
| CSII users                 | -0.136  | 0.071      | 0.057   |
| CSII non-users (reference) |         |            |         |
| Time                       |         |            |         |
| Time1 (reference)          |         |            |         |
| Time2                      | 0.149   | 0.030      | <0.001  |
| Time3                      | 0.215   | 0.032      | <0.001  |
| Time4                      | 0.268   | 0.034      | <0.001  |
| Age                        | -0.009  | 0.002      | <0.001  |
| Baseline HbA1c             | 0.553   | 0.023      | <0.001  |
| Ethnicity                  |         |            |         |
| Hispanic                   | 0.326   | 0.092      | <0.001  |
| Non-Hispanic (reference)   |         |            |         |
| Insurance                  |         |            |         |
| Private (reference)        |         |            |         |
| Public                     | 0.596   | 0.079      | <0.001  |

Table S4. Results of mixed effects regression model analyses for HbA1c by four group

| Variable                 | $\beta$ | Std. Error | P value |
|--------------------------|---------|------------|---------|
| Intercept                | 2.997   | 0.191      | <0.001  |
| Group                    |         |            |         |
| CGM+Pump                 | -0.311  | 0.094      | <0.001  |
| CGM+MDI                  | 0.046   | 0.121      | 0.705   |
| CSII+SMBG                | -0.182  | 0.104      | 0.079   |
| MDI+SMBG (reference)     |         |            |         |
| Time                     |         |            |         |
| Time1 (reference)        |         |            |         |
| Time2                    | 0.149   | 0.030      | <0.001  |
| Time3                    | 0.215   | 0.032      | <0.001  |
| Time4                    | 0.267   | 0.034      | <0.001  |
| Age                      | -0.006  | 0.002      | 0.004   |
| Baseline HbA1c           | 0.580   | 0.023      | <0.001  |
| Ethnicity                |         |            |         |
| Hispanic                 | 0.312   | 0.092      | <0.001  |
| Non-Hispanic (reference) |         |            |         |
| Insurance                |         |            |         |
| Private (reference)      |         |            |         |
| Public                   | 0.525   | 0.078      | <0.001  |

## Adapted Klompas Phenotype Algorithm for Type 1 and type 2 Diabetes Mellitus

### 1. Introduction:

This document describes the Stanford University algorithm to extract individuals with diabetes and the type of diabetes from electronic health records (EHRs). There are two main tasks of this phenotype development: 1) to extract patients with diabetes (gestational diabetes is excluded), and 2) to discriminate between type 1 diabetes mellitus (T1DM) and type 2 diabetes mellitus (T2DM). Instead of identifying all diabetes cases, we aim to reduce the number of false positives in our diabetes cohort. The prior is crucial for public health surveillance, yet we aim to achieve the later for clinical research use.

### 2. Algorithm Description:

Individuals with diabetes were identified by having diagnosis codes combined with either having abnormal laboratory results or being prescribed with diabetes-related medications. We then modified the Klompas (2013) algorithm<sup>1</sup> by including additional ICD-10 diagnosis codes to classify T1DM vs. T2DM. Structured data required from EHRs include:

- Diagnosis code (ICD-9 and ICD-10)
- Prescribed medication (RxNorm)
- Laboratory test results (LOINC)

#### 2.1. Diabetes Cohort Selection

Individuals with diabetes were identified using the following criteria. Diagnosis and medication codes are available in the Appendix.

- ICD-9 and/or ICD-10 codes for type 1 and/or type 2 diabetes *AND ANY* of the following criteria
  - With abnormal lab
    - Random glucose > 200 mg/dl
    - Fasting glucose  $\geq$  125 mg/dl
    - Hemoglobin A1c  $\geq$  6.5%
  - Being prescribed with diabetes-related medication

- Insulin
- glucagon
- glucagon-like peptide-1 (GLP-1) receptor agonists
- biguanides
- sulfonylurea
- thiazolidinediones
- meglitinides
- biguanides
- $\alpha$ -glucose inhibitor
- DPP-4 inhibitors
- SGLT2 inhibitors
- Cycloset

## 2.2. Classification algorithm for T1DM and T2DM

- Based on the Klompas (2013) algorithm, a patient will be classified as T1DM if *ANY* of the following present:
  - Ratio of T1DM to T2DM codes  $> 0.5$  and prescription for glucagon
  - Ratio of T1DM to T2DM codes  $> 0.5$  and no record of an oral hypoglycemic other than metformin
- A patient who did not meet the criteria for T1DM were presumptively classified as T2DM.

## Flow Diagram

This is a schematic representation of the phenotype definition logic described above.

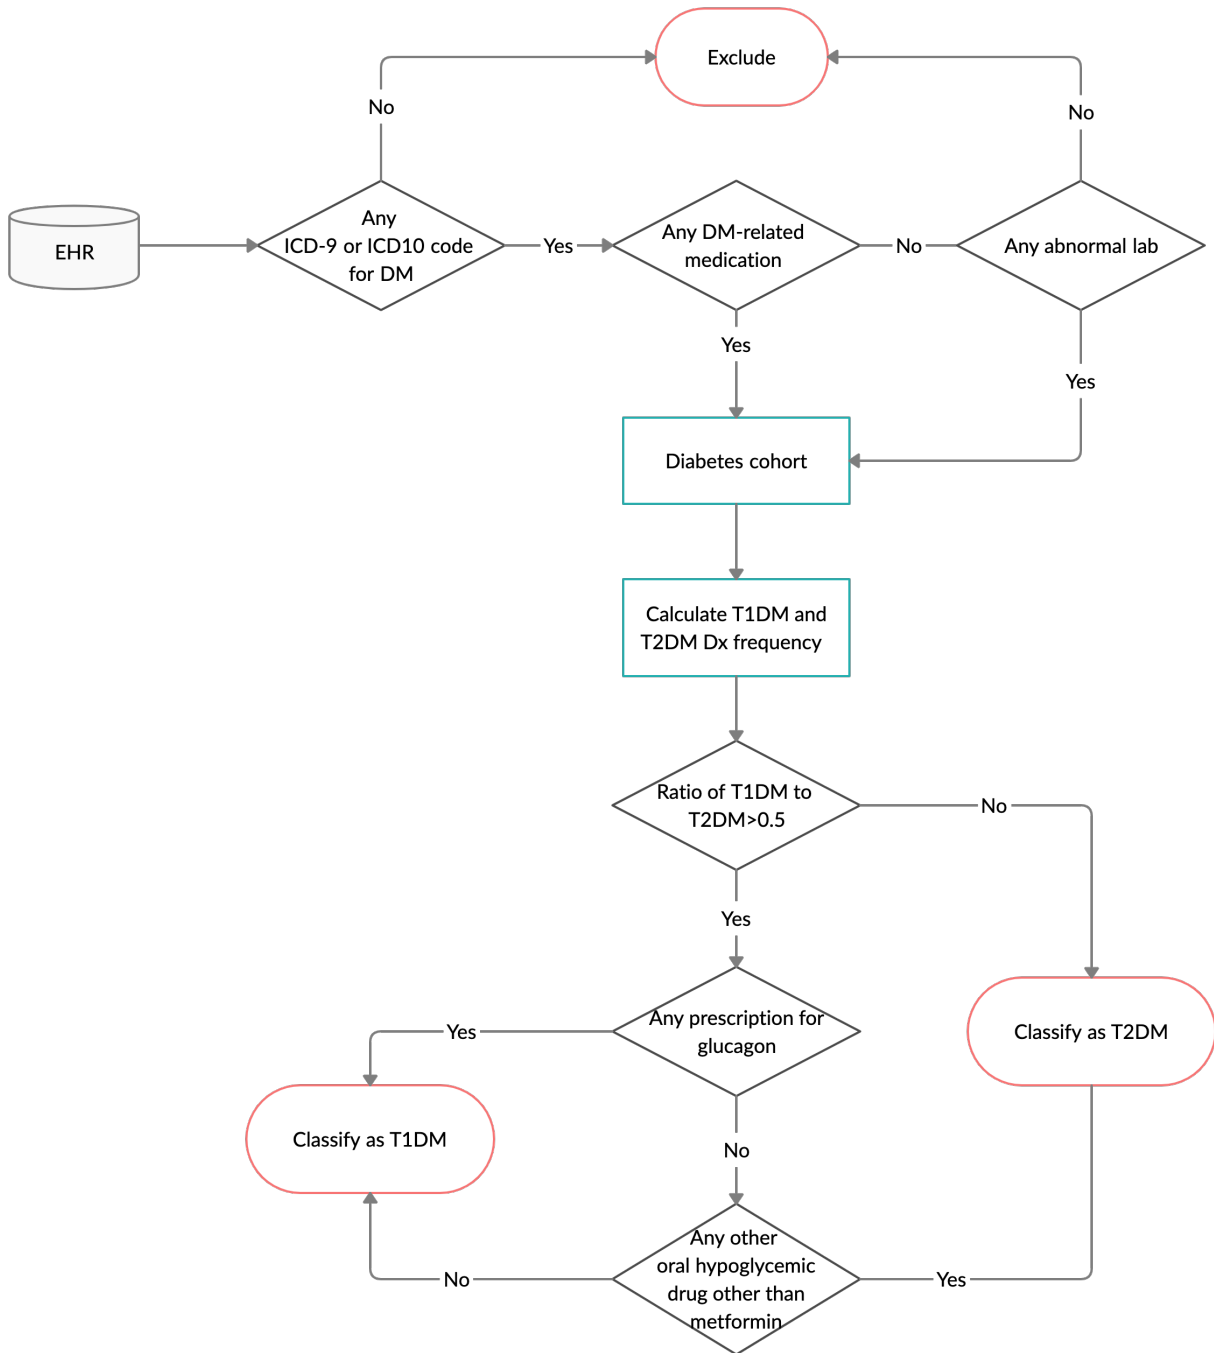

## Diagnosis and Medications

### Diagnosis code for diabetes

- ICD-9 code: 250.x
- ICD-10 code: E10.x, E11.x

### RxNorm/RXCUI codes for diabetes-related medications

| Generic Name                         | RxNorm CUI |
|--------------------------------------|------------|
| <b>Oral hypoglycemic medications</b> |            |
| Biguanides                           |            |
| Metformin                            | 6809       |
| Sulfonylureas                        |            |
| Glipizide                            | 4821       |
| Glyburide                            | 4815       |
| Gliclazide                           | 4816       |
| Glimepiride                          | 25789      |
| Thiazolidinediones                   |            |
| Rosiglitazone                        | 84108      |
| Pioglitazone                         | 33738      |
| Meglitinides                         |            |
| Repaglinide                          | 73044      |
| Nateglinide                          | 274332     |
| $\alpha$ -Glucosidase inhibitors     |            |
| Acarbose                             | 16681      |
| Miglitol                             | 30009      |
| DPP-4 inhibitors                     |            |
| Sitagliptin                          | 593411     |
| Saxagliptin                          | 857974     |
| Vildagliptin                         | 596554     |
| Linagliptin                          | 1100699    |
| Alogliptin                           | 1368001    |
| SGLT2 inhibitors                     |            |
| Dapagliflozin                        | 1488564    |
| Canagliflozin                        | 1373458    |
| GLP-1 receptor agonists              |            |



---

|                 |         |
|-----------------|---------|
| Exenatide       | 60548   |
| Lixisenatide    | 1440051 |
| Liraglutide     | 475968  |
| Semaglutide     | 1991302 |
| Dulaglutide     | 1551291 |
| Cycloset        |         |
| Bromocriptine   | 1760    |
| <b>Glucagon</b> | 4832    |
| <b>Insulin</b>  | 139825  |
|                 | 274783  |
|                 | 314684  |
|                 | 352385  |
|                 | 400008  |
|                 | 51428   |
|                 | 5856    |
|                 | 86009   |

---

**LOINC codes for diabetes laboratory test**

---

| Laboratory test | LOINC code |
|-----------------|------------|
| Random glucose  | 2339-0     |
|                 | 2345-7     |
| Fasting glucose | 1558-6     |
| Hemoglobin A1c  | 4548-4     |
|                 | 17856-6    |
|                 | 4549-2     |
|                 | 17855-8    |

---

## Reference

1. Klompas M, Eggleston E, McVetta J, Lazarus R, Li L, Platt R. Automated detection and classification of type 1 versus type 2 diabetes using electronic health record data. *Diabetes Care*. 2013 Apr 1;36(4):914-21.
